# Supplementary material for: “Mer hjelp, mindre moralpreken”: Hva brukere av anabole-androgene steroider ønsker fra helsetjenestene
Source: PubMed Central journal article supplement — Nordisk Alkohol Nark. 2018 Jan 17;35(1):69–76. [Article in Norwegian] doi: 10.1177/1455072517748871 (PMC7434117; doi:10.1177/1455072517748871), 2018-01-17
Supplement: NAD748871_Supplementary_Material.pdf [file NAD748871_Supplementary_Material.pdf]

”Mer hjelp, mindre moralpreken”: Hva brukere av anabole-androgene steroider ønsker fra helsetjenestene.

### *Spørsmålsoversikt*

1. Er du mann eller kvinne?
  - Mann
  - Kvinne
  
2. Hvor gammel er du?
  - Under 20 år
  - Mellom 20 – 29 år
  - Mellom 30 – 39 år
  - Mellom 40 – 49 år
  - 50 år eller eldre
  - Ønsker ikke å oppgi
  
3. Bruker du anabole steroider?
  - Ja
  - Nei
  - Nei, men har brukt før
  
4. Hvor lenge har du brukt anabole steroider?
  - Under ett år
  - 1 - 5 år
  - Mer enn 5 år
  
5. Hvor lenge brukte du anabole steroider?
  - Under ett år
  - 1 - 5 år
  - Mer enn 5 år
  
6. Hva er årsaken til at du bruker anabole steroider? (Flere svar mulig)
  - For å bli større/bygge muskler
  - For å gjøre det bedre innenfor idrett
  - Fordi det er gunstig for yrket mitt
  - Helsemessige årsaker
  - For å bli aggressiv
  
7. Hva var årsaken til at du brukte anabole steroider? (Flere svar mulig)
  - For å bli større/bygge muskler
  - For å gjøre det bedre innenfor idrett
  - Fordi det er gunstig for yrket mitt

## Vedlegg

- Helsemessige årsaker
  - For å bli aggressiv
8. Kunne du tenke deg å slutte med anabole steroider i fremtiden?
- Ja
  - Nei
  - Kanskje
9. Dersom du skulle sluttet med anabole steroider, hvordan ville du valgt å gjøre det? (Flere svar mulig)
- Alene
  - Behandling
  - Venner
  - Familie
10. Hvordan sluttet du med anabole steroider?
- Alene
  - Behandling
  - Venner
  - Familie
11. Dersom du skulle oppsøkt behandling, hvor ville du henvendt deg? (Flere svar mulig)
- Internett
  - Helsepersonell (lege, fysioterapeut, etc.)
  - Venner
  - Familie
12. Hvor henvendte du deg for å finne behandling? (For eksempel internett, lege)
13. Hva er viktig for deg dersom du skulle oppsøkt behandling? (For eksempel anonymitet, alene/ikke alene, ingenting o.l.)
14. Hva var viktig for deg da du oppsøkte behandling? (For eksempel anonymitet, alene/ikke alene, ingenting)
15. Er du bekymret over eventuelle konsekvenser av å oppsøke behandling?
- Ja
  - Nei
16. Var du bekymret over eventuelle konsekvenser av å oppsøke behandling?
- Ja
  - Nei

## Vedlegg

17. Hvilke konsekvenser er du bekymret for?

18. Har du noen gang søkt hjelp av helsepersonell (lege, fysioterapeut, etc.) for uønskede fysiske eller psykiske plager forårsaket av anabole steroider?

- Ja
- Nei, jeg har aldri oppsøkt hjelp for mine plager
- Jeg har aldri hatt uønskede plager
- Ønsker ikke å svare

19. Hadde du hatt et ønske om en gratis, uforpliktende legesjekk, dersom du fikk tilbud om det?

- Ja
- Nei
- Kanskje

20. Hvilke nettsider er du oftest inne på i løpet av en dag?

21. Hvor kan vi nå deg med et budskap?

22. Er det andre ting du mener kan være relevant som vi ikke har spurt om?
